# Supplementary material for: MiR-106a-5p inhibits the cell migration and invasion of renal cell carcinoma through targeting PAK5
Source: PubMed Central journal article supplement (PMC5680926; doi:10.1038/cddis.2017.561), 2017-10-26
Supplement: cddis2017561x1.pdf [file cddis2017561x1.pdf]

# Supplementary Figure 1

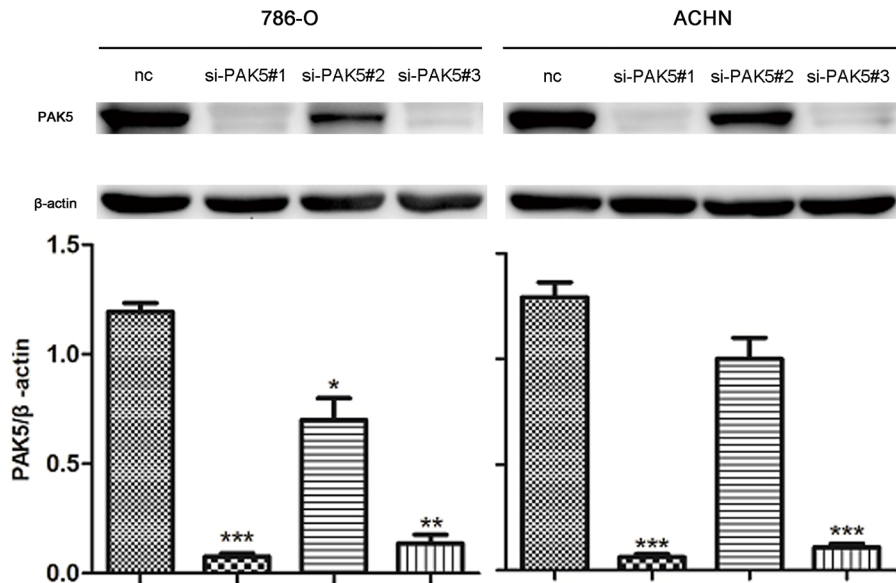

**Supplementary Figure 1: The effectiveness of small interfering RNA of PAK5.** Western blot analysis was used to detect the PAK5 protein level in 786-O (left) and ACHN (right) cells after transfection of three small interfering RNA of PAK5.  $\beta$ -actin was used as an internal control. (\* $P < 0.05$ , \*\* $P < 0.01$ , \*\*\* $P < 0.001$ )
