# Supplementary material for: MiR-106a-5p inhibits the cell migration and invasion of renal cell carcinoma through targeting PAK5
Source: PubMed Central journal article supplement (PMC5680926; doi:10.1038/cddis.2017.561), 2017-10-26
Supplement: cddis2017561x2.pdf [file cddis2017561x2.pdf]

## Supplementary Figure 2

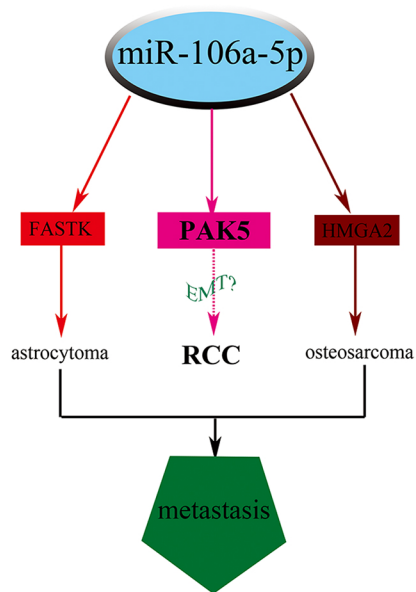

**Supplementary Figure 2: The relationships between miR-106a-5p and metastasis.** FASTK and HMGA2 are direct targets found in astrocytoma and osteosarcoma respectively, and in this study we found PAK5 was directly targeted by miR-106a-5p.
